# Supplementary material
Source: publisher site journal article supplement (https://www.dovepress.com/article/267493)
Supplement: Supplementary file 1 [file get_supplementary_file.php]

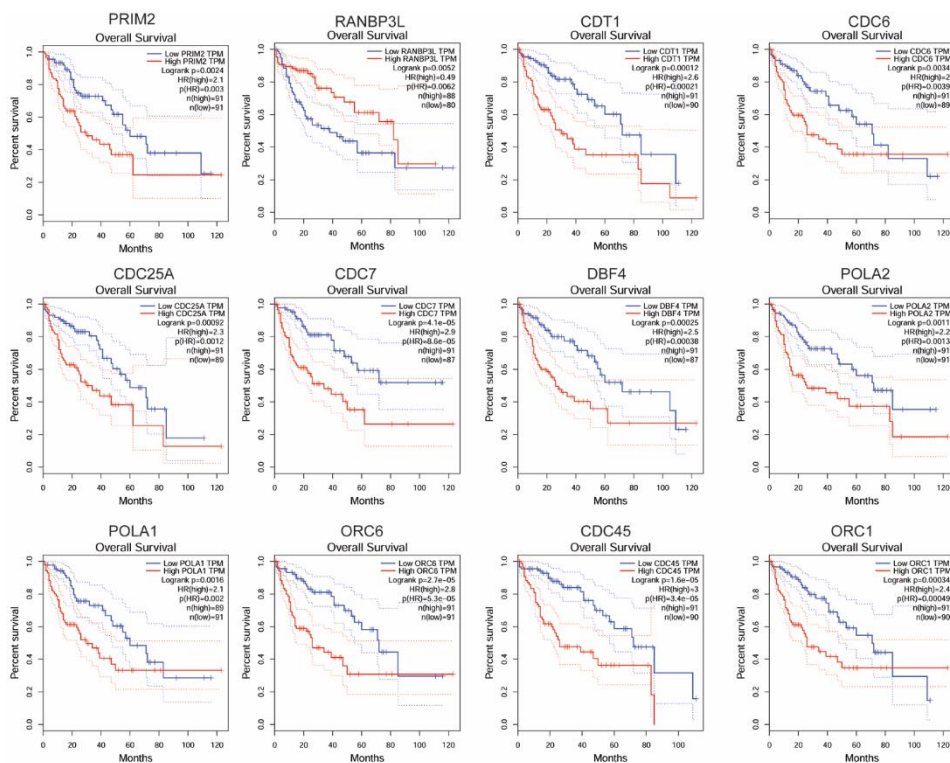

Supplemental Figure S1. Survival analysis of the differentially expressed genes (PRIM2, RANBP3L, CDT1, CDC6, CDC25A, CDC7, DBF4, POLA2, POLA1, ORC6, CDC45, ORC1) by using the GEPIA database.
